# Supplementary material
Source: PubMed Central journal article supplement (PMC1559744)

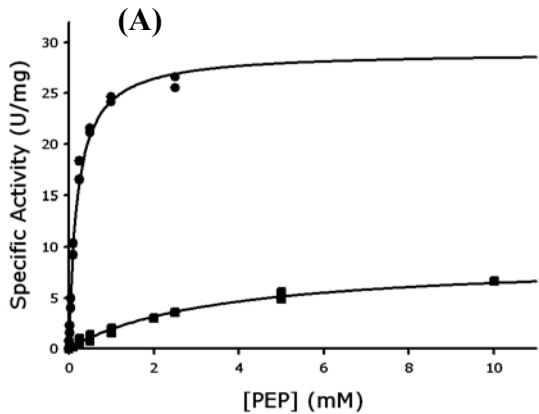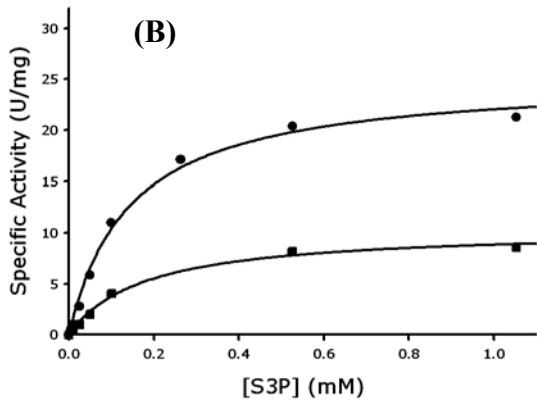

Supplement: pnas_0603638103_1.pdf [file pnas_0603638103_1.pdf]

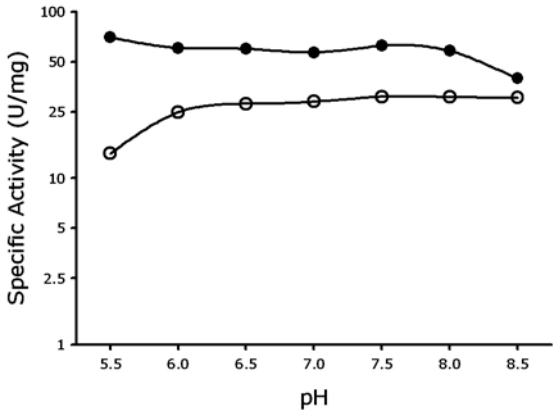

Supplement: pnas_0603638103_2.pdf [file pnas_0603638103_2.pdf]

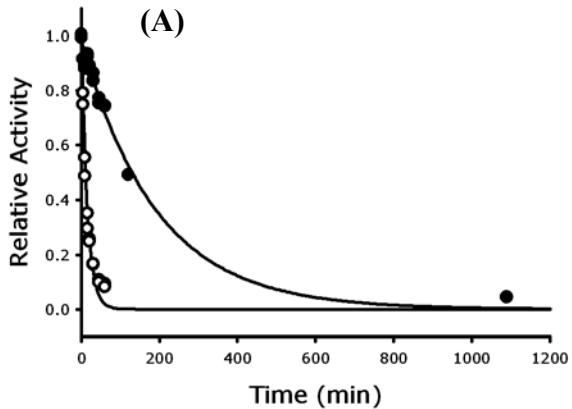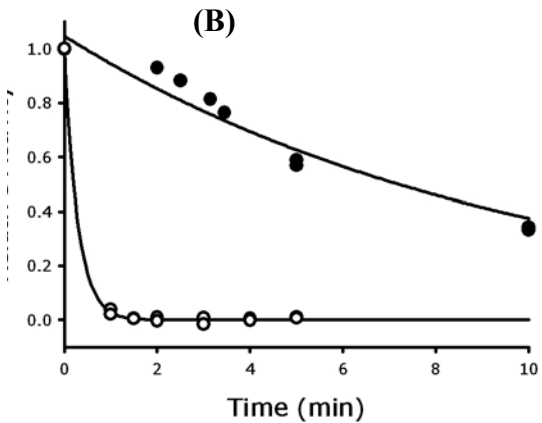

Supplement: pnas_0603638103_3.pdf [file pnas_0603638103_3.pdf]

**(A)**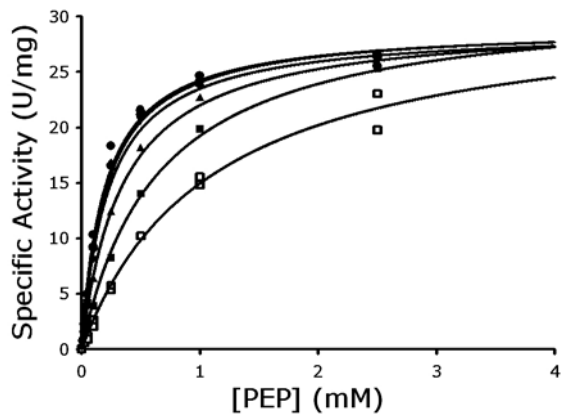**(B)**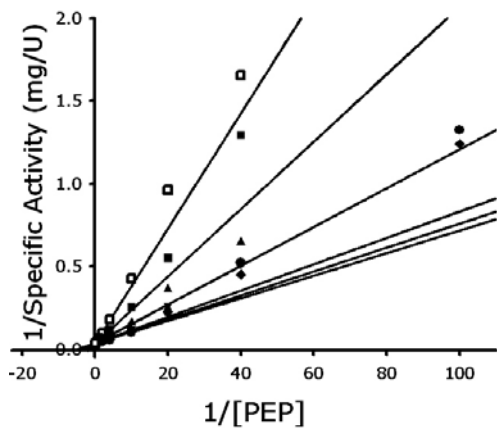**(C)**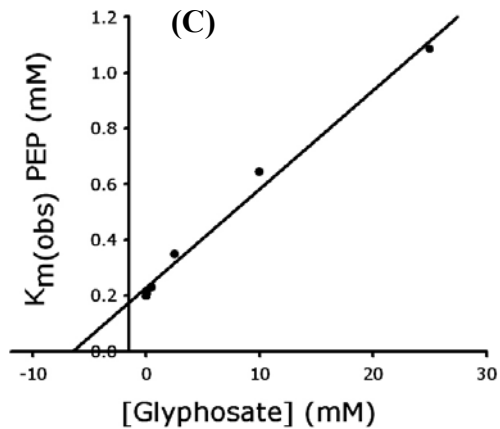

Supplement: pnas_0603638103_4.pdf [file pnas_0603638103_4.pdf]

**(A)**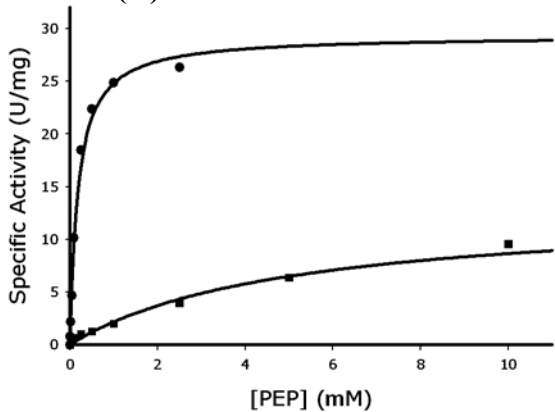**(B)**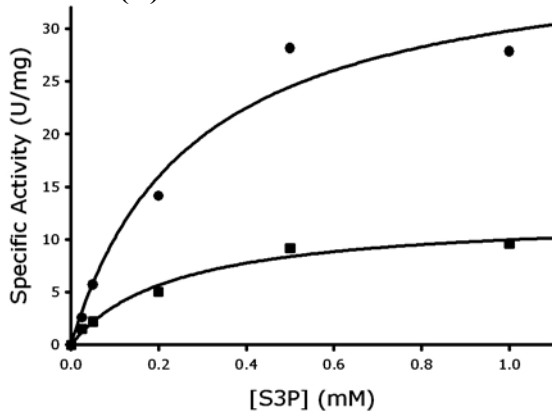

Supplement: pnas_0603638103_5.pdf [file pnas_0603638103_5.pdf]

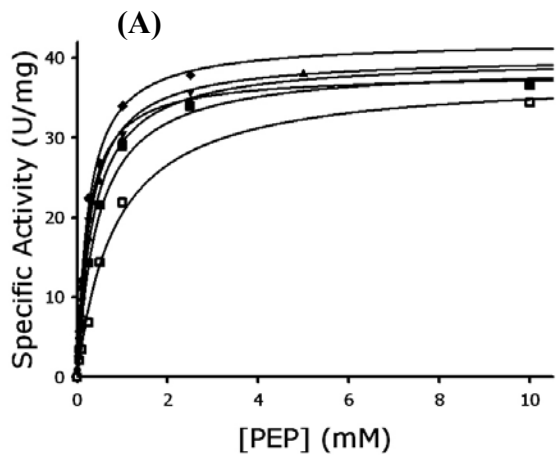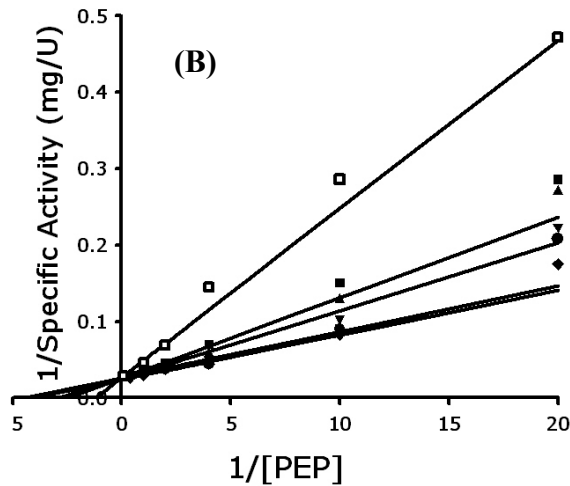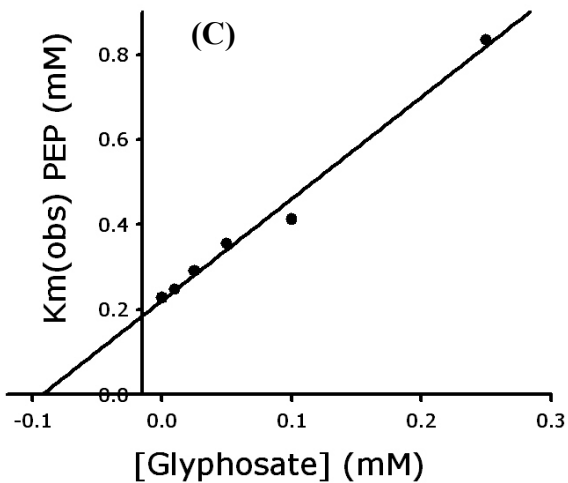

Supplement: pnas_0603638103_6.pdf [file pnas_0603638103_6.pdf]
